# Supplementary material
Source: PubMed Central journal article supplement (PMC3310166)
Supplement: NIHMS348843-supplement-Supporting_Information.pdf [file NIHMS348843-supplement-Supporting_Information.pdf]

# **Supporting Information**

# 1. Simulation Condition Summary

| Template                                                                 | Experiments |                     | Model T (original) |                  | Model T (replicated) |                     | Model B  |                     |
|--------------------------------------------------------------------------|-------------|---------------------|--------------------|------------------|----------------------|---------------------|----------|---------------------|
|                                                                          | $T$ (°C)    | [NTP] ( $\mu$ M)    | $T$ (°C)           | [NTP] ( $\mu$ M) | $T$ (°C)             | [NTP] ( $\mu$ M)    | $T$ (°C) | [NTP] ( $\mu$ M)    |
| 10                                                                       | 37          | ACGU: 40            | 37                 | ACGU: 40         | 37                   | ACGU: 40            | 25       | ACGU: 40            |
| 11, 12, 13                                                               | 37          | ACGU: 30            | 37                 | ACGU: 30         | 37                   | ACGU: 30            | 25       | ACGU: 30            |
| D104, D111, D112, D123, D167, D387                                       | 30          | ACGU: 10            | 37                 | ACGU: 10         | 37                   | ACGU: 10            | 25       | ACGU: 10            |
| pKA2                                                                     | 25          | ACGU: 1000          | NA                 | NA               | 25                   | ACGU: 1000          | 25       | ACGU: 1000          |
| pTS147                                                                   | 25          | ACG: 1000<br>U: 200 | NA                 | NA               | 25                   | ACG: 1000<br>U: 200 | 25       | ACG: 1000<br>U: 200 |
| $\lambda$ tR1                                                            | 25          | ACGU: 100           | NA                 | NA               | 25                   | ACGU: 100           | 25       | ACGU: 100           |
| <i>his, ops</i>                                                          | 25          | ACU: 1000<br>G: 250 | NA                 | NA               | 25                   | ACU: 1000<br>G: 250 | 25       | ACU: 1000<br>G: 250 |
| For transcription gel simulations (Figure 2 and Supplementary Materials) |             |                     |                    |                  |                      |                     |          |                     |
| D104, D111, D112, D123, D167, D387                                       | 30          | ACGU: 10            | NA                 | NA               | 25                   | ACGU: 25            | 25       | ACGU: 25            |

For sequence information, see Material and Methods under Supporting Information.

## 2. Comparison of Pause Location Predictions at Low [NTP]

The following tables show the measured (column 1) and predicted (column 2-4) pause locations on ten sequences used in Tadigotla et al. (2006). The pause locations were identified on these sequences at low [NTP] (also see Supplementary Materials under Simulation Condition Summary). Using the same treatment as in Tadigotla et al., all pauses within 3 bp are considered as a single pause cluster.

Column 2 shows predictions by the original Model T. Pause threshold  $\xi = 0.015$ .

Column 3 shows predictions by the replicated Model T. Pause threshold  $\xi = 0.015$ .

Column 4 shows predictions by Model B (2007). Pause threshold  $\eta = 0.050$ .

Column 5 shows predictions by Model B (2004). Pause threshold  $\eta = 0.055$ .

### Seq. 10

| Experiment | Model T<br>(original) | Model T<br>(replicated) | Model B<br>(2007) | Model B<br>(2004) |
|------------|-----------------------|-------------------------|-------------------|-------------------|
| 27         |                       |                         |                   |                   |
| 34         | 31-32                 | 31-32, 37               | 31-32, 37         | 31-32, 37         |
|            | 47                    | 47                      |                   |                   |
| 56         | 57-58                 | 57-58                   | 56                | 56                |
|            |                       |                         | 63                | 63                |
| 67         | 69-70                 | 69-70                   |                   |                   |
|            |                       |                         | 74                | 74                |
| 80         | 81-84                 | 81-85                   | 81-83             | 83                |
|            | 93                    | 93                      | 92-93             |                   |
|            | 97-100                | 97-102                  |                   |                   |

**Seq. 11**

| Experiment | Model T<br>(original) | Model T<br>(replicated) | Model B<br>(2007) | Model B<br>(2004) |
|------------|-----------------------|-------------------------|-------------------|-------------------|
| 25-27      |                       |                         |                   |                   |
| 33-35      | 31-32                 | 31-32                   | 31-32             | 31-32             |
| 38         | 37                    | 37                      |                   |                   |
|            | 42                    | 42                      | 43                | 43                |
| 47,48      | 48                    | 48                      | 47                | 47                |
| 53         | 53                    | 53                      | 50-53             | 50-53             |
|            |                       | 62                      | 58                | 58                |
|            |                       |                         | 67                | 67                |
| 73         | 68-73                 | 67-73                   |                   |                   |
|            | 78-79                 | 78-79                   | 77-78             | 77-78             |
|            |                       | 83                      | 83                | 83                |
|            | 93-94                 | 93-94                   | 90                |                   |
| 100        |                       |                         | 102-103           | 102               |

**Seq. 12**

| Experiment | Model T<br>(original) | Model T<br>(replicated) | Model B<br>(2007) | Model B<br>(2004) |
|------------|-----------------------|-------------------------|-------------------|-------------------|
| 35         |                       | 33                      | 32                | 32                |
| 37,39      | 37                    | 37                      |                   |                   |
|            |                       |                         | 43                | 43                |
|            | 53-55                 | 53-56                   |                   | 53                |
| 61         | 57-58                 | 57-58                   | 63                | 63                |

**Seq. 13**

| Experiment | Model T<br>(original) | Model T<br>(replicated) | Model B<br>(2007) | Model B<br>(2004) |
|------------|-----------------------|-------------------------|-------------------|-------------------|
|            | 33                    | 33                      | 32                | 33                |
| 39         | 37                    | 37                      |                   |                   |
| 45         |                       |                         | 43                | 43                |
| 55         | 57-60                 | 57-61                   | 57                |                   |
| 63         |                       |                         | 66                |                   |
| 72         | 68-75                 | 68-76                   | 69, 75            | 69                |
|            |                       |                         | 81                |                   |
| 89         | 85-89                 | 85-89                   | 85-88             | 85-88             |
|            |                       |                         | 94-99             | 95-100            |

**Seq. D112**

| Experiment | Model T<br>(original) | Model T<br>(replicated) | Model B<br>(2007) | Model B<br>(2004) |
|------------|-----------------------|-------------------------|-------------------|-------------------|
| 32         | 31-32                 | 31-32                   | 31-32             | 31-32             |
| 37         | 38                    | 37                      | 37                | 37                |
|            | 47-48                 | 47-48                   | 50                | 47-49             |
|            | 58-61                 | 58-61                   | 58-59             | 58-59             |
| 76         | 71-76                 | 71-78                   | 69, 72-73         | 69, 73-74         |
|            | 80-87                 | 80-88                   | 80                | 80, 83            |
| 95         | 93, 96-98             | 92-93, 96-98            | 92, 96            | 92, 96            |
|            |                       |                         | 103, 106          | 102-106           |
| 111        | 113                   |                         |                   |                   |
| 116        | 115                   | 115                     |                   |                   |
| 120        | 117-120               | 117-120                 |                   |                   |

**Seq. D104**

| Experiment | Model T (original) | Model T (replicated) | Model B (2007) | Model B (2004) |
|------------|--------------------|----------------------|----------------|----------------|
| 32         | 31-32              | 31-32                | 31-32          | 31-32          |
| 37         | 38                 | 37                   | 37             | 37             |
|            | 47-48              | 47-48                | 50             | 47-49          |
|            | 58-61              | 58-61                | 58-59          | 58-59          |
| 75,77      | 71-76              | 71-76                | 69, 72-73      | 69, 73-74      |
| 78,80      | 78, 81-87          | 77-89                | 80             | 80             |
| 90,91,92   |                    |                      |                |                |
| 94, 96     | 95-96              | 95-96                | 97             |                |
| 104,107    | 103-108            | 103-109              | 103-104        | 103-104        |
| 115,118    | 116-117            | 116-117              | 113-116        | 113-116        |
| 128        | 125                | 125                  | 125            | 125            |

**Seq. D111**

| Experiment | Model T (original) | Model T (replicated) | Model B (2007) | Model B (2004) |
|------------|--------------------|----------------------|----------------|----------------|
| 31         | 31-32              | 31-32                | 31-32          | 31-32          |
| 37         | 37                 | 37                   | 37             | 37             |
| 39,40      |                    |                      | 43-44          | 44             |
| 48         | 47                 | 47                   | 46             | 46             |
| 56,57,59   | 53-59              | 53-61                | 55-58          | 57-58          |
| 63         |                    |                      | 63             | 63             |
| 69         | 70-71              | 70-71                | 70             |                |
|            | 74                 |                      |                |                |
|            | 80-81              | 79-84                | 79-80          | 79-80, 85      |
|            | 93                 | 93                   |                |                |
|            | 96-99              | 96-99                | 96, 98         | 96-98          |
|            | 103-104            | 103-104              | 102, 105       |                |
| 109        | 108                | 107-108              | 107-108        | 107-108        |
|            | 114-117            | 114-117              | 113-116        | 113-116        |
| 121        |                    |                      | 124            | 123-124        |
| 128        | 125                |                      | 125            | 125            |

**Seq. D123**

| Experiment | Model T (original) | Model T (replicated) | Model B (2007) | Model B (2004) |
|------------|--------------------|----------------------|----------------|----------------|
|            | 31-32              | 31-32                | 31-32          | 31-32          |
| 37         |                    |                      |                |                |
| 43,44      | 41-45              | 41-47                | 41             | 41             |
| 49         |                    |                      | 47             | 47             |
| 53         | 53-56              | 53-56                | 53             | 54             |
|            | 60-61              | 60-62                |                |                |
| 71         |                    |                      | 69-70          | 70             |
| 78         | 80-82              | 80-82                | 75, 79-81      | 80             |
| 85         | 85                 | 85-86                | 84             | 84             |
|            | 97-99              | 97-99                | 96             | 96             |
| 103        | 102-104            | 102-104              | 102            | 102            |
|            |                    |                      |                | 108            |
|            | 114-116            | 114-116              | 116            | 114-117        |
| 127        | 128                | 128-130              | 126-129        | 127-132        |



**Seq. D167**

| Experiment | Model T (original) | Model T (replicated) | Model B (2007) | Model B (2004) |
|------------|--------------------|----------------------|----------------|----------------|
| 31-33      | 31-32              | 31-32                | 31-32          | 31-32          |
| 37         |                    | 37                   | 37             | 37             |
| 41         |                    | 42                   | 42             | 42             |
|            | 48                 | 47-48                | 47-48          | 47-49          |
| 56         | 54-57              | 54-57                | 57             | 54, 57         |
|            | 67-69              | 67-70                | 67, 71         | 67, 71         |
| 81         | 77-82              | 76-82                | 77-78, 81      | 77-78, 81      |
|            | 89-91              | 89-91                | 89             | 89             |
| 100        | 99-100             | 98-101               | 98-99          | 98-99          |
|            | 104-107            | 104-107              | 104, 106       | 104-110        |
| 114        | 115-116            | 115-116              | 114            |                |

**Seq. D387**

| Experiment | Model T (original) | Model T (replicated) | Model B (2007) | Model B (2004) |
|------------|--------------------|----------------------|----------------|----------------|
| 32         | 31-32              | 31-32                | 31-32          | 31-32          |
| 37         | 38                 | 37                   | 37             | 37             |
|            | 47-48              | 47-48                | 50             | 47-49          |
|            | 58-61              | 58-61                | 58-59          | 58-59          |
| 72,74,76   | 71-78              | 71-79                | 69, 72-73      | 69, 73-74      |
|            | 82-85              | 80-86                | 83-84          | 83-84          |
| 90,91      | 87                 | 87-88, 93            | 93             |                |
| 100        | 96-99              | 96-99                | 96, 101        | 96, 101        |
| 107,108    | 108-110            | 108-110              | 108-109        | 108-109        |
| 116        | 114-116            | 114-116              | 114-115        | 114, 119       |

## Summary of Comparison of Pause Location Predictions at Low [NTP]

Predictions of pause locations by the replicated Model T agree well with those by the original Model T of Tadigotla et al. (2006). On the ten DNA templates examined, the original Model T predicted a total of 87 pause clusters and the replicated Model T predicted 90 pause clusters. The predictions have 84 clusters in common. Therefore, the replicated Model T reproduced ~ 97 % of the pauses predicted by the original Model T.

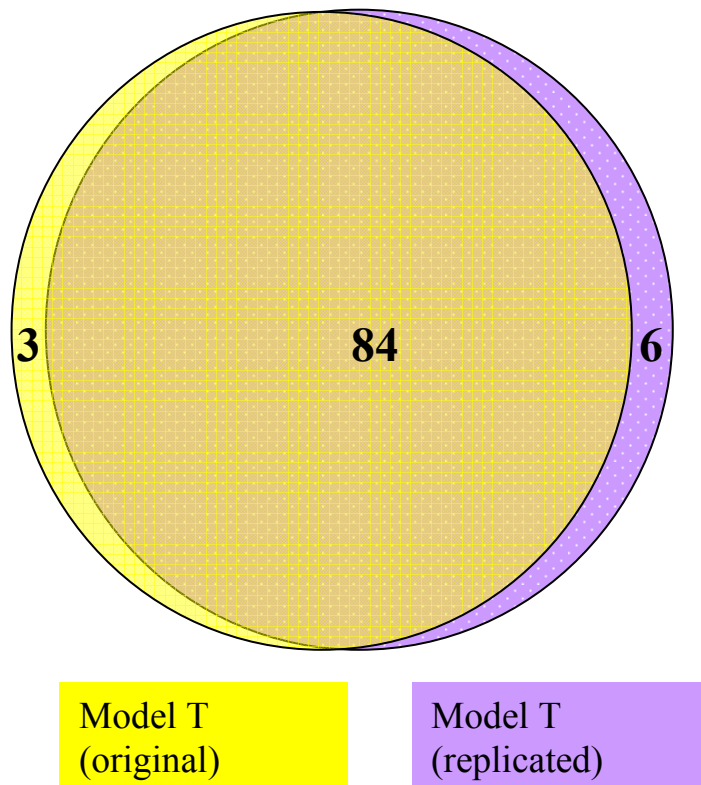

### 3. Comparison of Pause Location Predictions at High [NTP]

The following two tables show the measured (column 2) and predicted (column 3-5) pause locations on five sequences at high [NTP] (also see Supplementary Materials under Simulation Condition Summary).

Column 3 shows predictions by the replicated Model T. Pause threshold  $\xi = 0.005$ .

Column 4 shows predictions by Model B (2007). Pause threshold  $\eta = 0.10$ .

Column 5 shows predictions by Model B (2004). Pause threshold  $\eta = 0.12$ .

| Template           | Experiment | Model T<br>(replicated) | Model B<br>(2007) | Model B<br>(2004) |
|--------------------|------------|-------------------------|-------------------|-------------------|
| pKA2               | 153        |                         | 151-152           | 151-153           |
|                    |            | 178-181                 |                   |                   |
|                    | 235        | 235-236                 | 233, 236          | 234               |
|                    |            | 261                     |                   | 261               |
| $\Delta$ tR2       | 83, 84     | 83,84                   | 83, 84            | 83, 84            |
|                    |            | 94-95                   |                   |                   |
| $\lambda$ sequence |            | 91-94                   |                   |                   |
|                    | 96         | 97-104                  | 97                | 97                |
|                    |            | 106-108                 | 108, 109          | 108, 109          |
|                    | 115        |                         | 118-119           | 118               |
|                    |            | 119-121                 |                   |                   |
|                    | 127        | 130-131                 | 129               | 129               |
|                    | 135        |                         | 136-137           | 136-137           |
|                    | 174        | 173-175                 | 173               | 173               |
|                    |            | 179-181                 |                   |                   |
|                    | 185        | 184-186                 | 183, 189          | 183, 189          |

| Template | Experiment | Model T<br>(replicated) | Model B<br>(2007) | Model B<br>(2004) |
|----------|------------|-------------------------|-------------------|-------------------|
| ops      | 5          | 5                       | 5                 | 5                 |
|          |            |                         | 18                | 18                |
|          | 30         | 27-28                   | 28                | 28                |
|          |            |                         | 37                | 37                |
|          | 63         |                         |                   |                   |
|          |            | 83-86                   |                   |                   |
|          | 90         | 87-88                   | 88                | 88                |
|          |            |                         | 99, 101-102       | 99-102            |
|          | 151, 153   | 147-152                 | 150               |                   |
|          |            |                         | 162               | 162               |
| his      | 5          |                         | 5                 | 5                 |
|          |            |                         | 18                | 18                |
|          | 30         | 27-28                   | 28                | 28                |
|          |            |                         | 37                | 37                |
|          | 63         |                         |                   |                   |
|          |            | 83-86                   |                   |                   |
|          | 90         | 87-88                   | 88                | 88-89             |
|          |            |                         | 99, 101           | 100-102           |
|          |            |                         | 154               |                   |
|          | 158        |                         |                   |                   |

## 4. Comparison of Pause Kinetics on Templates D167 and D387

### Predicted Pause Durations by Model B (2007)

Note that the corresponding simulated transcription gels are shown in Figure 2.

| Pause locations on D167 | Duration (s) | Pause locations on D387 | Duration (s) |
|-------------------------|--------------|-------------------------|--------------|
| 31                      | 8.4          | 31                      | 5.3          |
| 32                      | 11.1         | 32                      | 21.7         |
| 37                      | 5.1          | 37                      | 4.7          |
| 42                      | 4.8          | 50                      | 1.8          |
| 47                      | 2.6          | 59                      | 3.3          |
| 48                      | 4.5          | 69                      | 2.4          |
| 57                      | 5.1          | 72                      | 1.5          |
| 67                      | 3.1          | 73                      | 4.3          |
| 71                      | 4.7          | 84                      | 1.9          |
| 77                      | 3.6          | 96                      | 1.5          |
| 78                      | 36.4         | 101                     | 2.1          |
| 89                      | 1.6          | 109                     | 2.2          |
| 98                      | 2.7          | 114                     | 3.9          |
| 99                      | 58.5         | 115                     | 1.5          |
| 104                     | 15.9         |                         |              |
| 110                     | 1.9          |                         |              |
| 114                     | 1.5          |                         |              |

## Predicted Pause Durations by Model T

| Pause locations on D167 | Duration (s) | Pause locations on D387 | Duration (s) |
|-------------------------|--------------|-------------------------|--------------|
| 31                      | 4.3          | 31                      | 1.8          |
| 32                      | 120.5        | 32                      | 26.2         |
| 37                      | 0.6          | 37                      | 1.8          |
| 42                      | 2.1          | 47                      | 0.3          |
| 47                      | 0.3          | 58                      | 0.6          |
| 48                      | 0.8          | 59                      | 36.2         |
| 54                      | 3.2          | 60                      | 6.4          |
| 55                      | 0.3          | 61                      | 0.5          |
| 67                      | 1.0          | 71                      | 1.9          |
| 68                      | 10.0         | 72                      | 26.7         |
| 69                      | 2.0          | 73                      | 186.5        |
| 76                      | 0.3          | 74                      | 1211.9       |
| 77                      | 1.3          | 75                      | 296.6        |
| 78                      | 226.3        | 76                      | 46.5         |
| 79                      | 641.1        | 77                      | 18.9         |
| 81                      | 2.7          | 78                      | 10.7         |
| 90                      | 0.9          | 79                      | 1.3          |
| 91                      | 0.6          | 80                      | 2.3          |

**Predicted Pause Durations by Model T (continued)**

| Pause locations on D167 | Duration (s) | Pause locations on D387 | Duration (s) |
|-------------------------|--------------|-------------------------|--------------|
| 98                      | 0.4          | 81                      | 5.0          |
| 99                      | 147.8        | 82                      | 3.6          |
| 100                     | 98.3         | 84                      | 1.7          |
| 101                     | 5.8          | 85                      | 0.9          |
| 104                     | 5.7          | 86                      | 0.4          |
| 105                     | 49.9         | 87                      | 0.6          |
| 115                     | 0.8          | 96                      | 0.4          |
| 116                     | 1.0          | 97                      | 2.7          |
|                         |              | 98                      | 10.6         |
|                         |              | 99                      | 1.3          |
|                         |              | 108                     | 0.4          |
|                         |              | 109                     | 9.5          |
|                         |              | 114                     | 1.6          |
|                         |              | 115                     | 24.5         |
|                         |              | 116                     | 22.7         |

## References

- Bai L, Shundrovsky A, Wang MD (2004) Sequence-dependent kinetic model for transcription elongation by RNA polymerase. *J. Mol. Biol.* 344:335-349.
- Bai L, Fulbright RM, Wang MD (2007) Mechanochemical kinetics of transcription elongation. *Phys. Rev. Lett.* 98:068103.
- Herbert KM, *et al.* (2006) Sequence-resolved detection of pausing by single RNA polymerase molecules. *Cell* 125:1083-1094.
- Levin JR, Chamberlin MJ (1987) Mapping and characterization of transcriptional pause sites in the early genetic region of bacteriophage T7. *J Mol Biol* 196:61-84.
- Tadigotla VR, *et al.* (2006) Thermodynamic and kinetic modeling of transcriptional pausing. *Proc Natl Acad Sci U S A* 103:4439-4444.
- von Hippel P & Yager T (1991) Transcript elongation and termination are competitive kinetic processes. *Proc Natl Acad Sci U S A* 88, 2307-2311.
